# Supplementary material for: Molecular Epidemiology of Tuberculosis in British Columbia, Canada: A 10-Year Retrospective Study
Source: PubMed Central journal article supplement (PMC5850024; doi:10.1093/cid/cix906), 2017-10-21
Supplement: cix906_suppl_supplementary_data.pdf [file cix906_suppl_supplementary_data.pdf]

**SUPPLEMENTARY DATA**

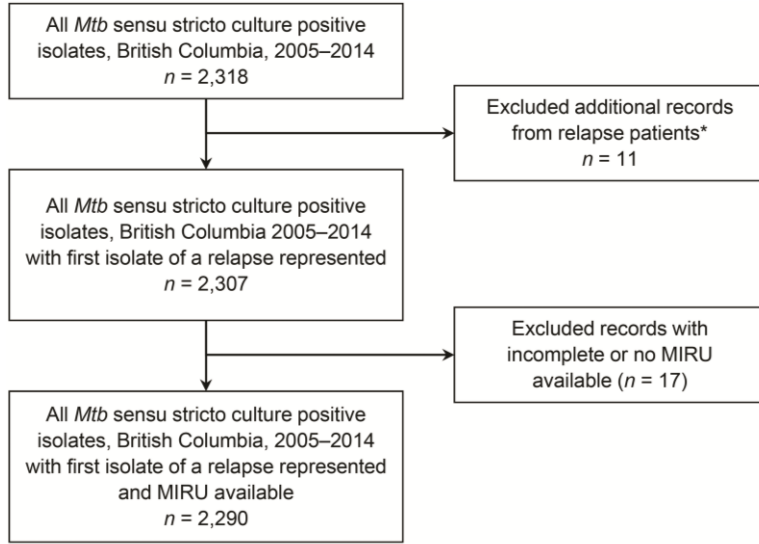

\*First episode for a relapse patient was maintained in the study; relapse was defined as a subsequent episode with a genotype  $\leq 1$  MIRU loci different to the initial episode.

**Figure S1.** Study inclusion/exclusion criteria.

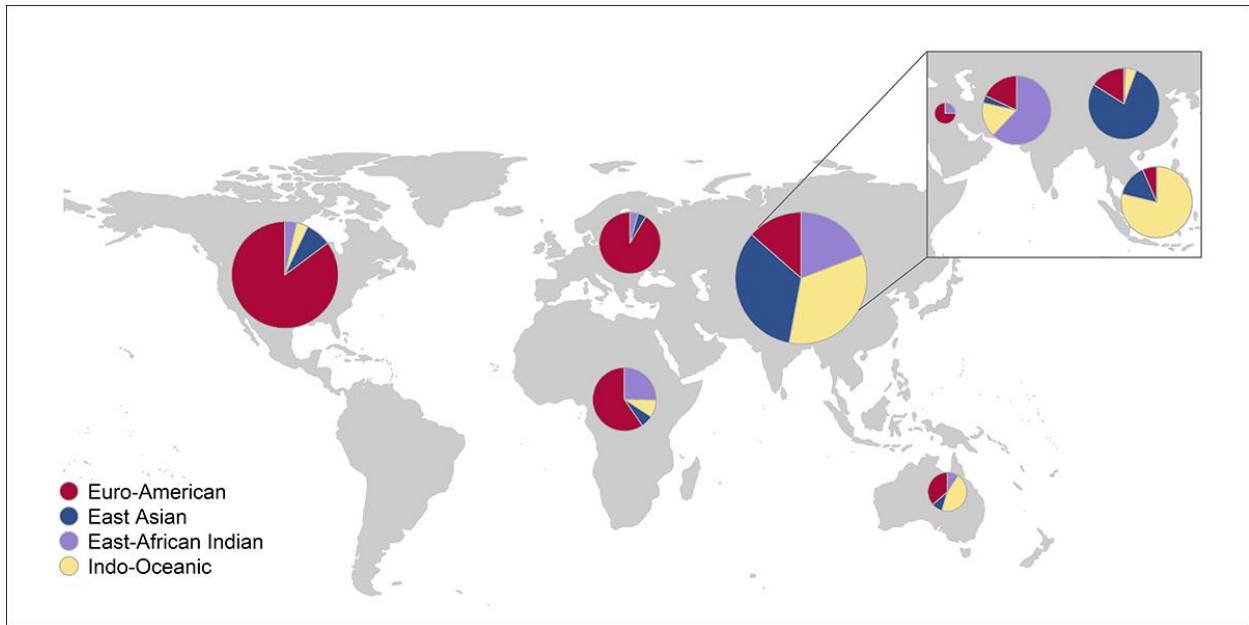

**Figure S2.** Relative frequency of *Mycobacterium tuberculosis* sensu stricto lineages by patients' continent of birth. The inset map separates the *Mtb* lineages of Asian-born patients into the relative frequency observed within each Asian sub-continent. Pie chart areas are scaled relative to the number of cases.

**Table S1.** Characteristics of multi-drug resistant *Mycobacterium tuberculosis* patients in British Columbia, 2005–2014 ( $n=18$ ).

| Birth Sub-Continent | Region* | Case Type   | Disease Site†     | Lineage             | 24MIRU Cluster‡ |
|---------------------|---------|-------------|-------------------|---------------------|-----------------|
| North America       | GVR     | New         | Resp.             | East-Asian          | Yes             |
| North America       | GVR     | New         | Resp.             | East-Asian          | Yes§            |
| East Asia           | GVR     | New         | Resp.             | East-Asian          | Yes§            |
| East Asia           | GVR     | New         | Resp.             | East-Asian          |                 |
| East Asia           | GVR     | Retreatment | Resp.             | East-Asian          | Yes             |
| East Asia           | GVR     | Retreatment | Resp.             | East-Asian          |                 |
| South-Central Asia  | GVR     | New         | Resp.             | East-African-Indian | Yes             |
| South-Eastern Asia  | GVR     | Retreatment | Resp.             | Indo-Oceanic        |                 |
| South-Eastern Asia  | GVR     | New         | Non-Resp.         | Indo-Oceanic        |                 |
| South-Eastern Asia  | GVR     | New         | Non-Resp.         | Indo-Oceanic        | Yes             |
| South-Eastern Asia  | GVR     | New         | Resp. + Non-Resp. | Indo-Oceanic        |                 |
| Northern Europe     | GVR     | New         | Resp.             | East-Asian          | Yes             |
| East Asia           | GVR     | Retreatment | Resp.             | East-Asian          |                 |
| East Asia           | GVR     | New         | Resp.             | East-Asian          | Yes             |
| East Asia           | non-GVR | Retreatment | Resp.             | East-Asian          |                 |
| East Asia           | GVR     | Retreatment | Resp.             | East-Asian          |                 |
| South-Eastern Asia  | GVR     | New         | Resp.             | East-Asian          |                 |
| South-Eastern Asia  | GVR     | New         | Resp.             | East-Asian          |                 |

\*GVR: Greater Vancouver Region.

†Resp. = respiratory; Non-Resp. = non-respiratory.

‡Yes indicates that the isolate belongs to a 24MIRU cluster.

§Same cluster; known transmission event.

**Table S2.** *Mycobacterium tuberculosis* sensu stricto lineages by anatomical disease site in British Columbia, 2005–2014.\*

| Lineage             | No. Patients (%) |            |           | NRTB vs. RTB<br>OR (95%CI) |
|---------------------|------------------|------------|-----------|----------------------------|
|                     | RTB              | NRTB       | RTB+NRTB  |                            |
| Euro-American       | 723 (83.0)       | 91 (10.4)  | 57 (6.5)  | Reference                  |
| East-Asian          | 456 (81.9)       | 70 (12.6)  | 31 (5.6)  | 1.2 (0.9–1.7)              |
| East-African Indian | 252 (76.4)       | 60 (18.2)  | 18 (5.5)  | 1.9 (1.3–2.7)              |
| Indo-Oceanic        | 336 (63.2)       | 142 (26.7) | 54 (10.2) | 3.4 (2.5–4.5)              |

RTB—exclusively respiratory; NRTB—exclusively non-respiratory; RTB+NRTB—respiratory+non-respiratory; OR—odds ratio; CI—confidence interval.

\*Percentages have been rounded and may not total to 100%.

**Table S3.** Characteristics of 24-locus MIRU–VNTR clusters comprised of  $\geq 10$  individuals, displayed as clusters that were predominantly Canadian- or foreign-born: British Columbia, 2005–2014.

| Cluster ID    | Cluster Size | Predominant Birthplace* (%) | Median Age (IQR) years | Gender M:F | Predominant Community Type (%) | Lineage             |
|---------------|--------------|-----------------------------|------------------------|------------|--------------------------------|---------------------|
| Canadian-born |              |                             |                        |            |                                |                     |
| MClust-002    | 70           | Canada (88.1)               | 50 (43–57)             | 13.0       | Metro (78.6)                   | Euro-American       |
| MClust-012    | 64           | Canada (87.1)               | 48 (40–56)             | 3.0        | Metro (79.7)                   | Euro-American       |
| MClust-001    | 56           | Canada (96.4)               | 40 (29–48)             | 0.8        | Rural (75.0)                   | Euro-American       |
| MClust-003    | 39           | Canada (97.4)               | 45 (29–50)             | 1.8        | Rural (56.4)                   | Euro-American       |
| MClust-008    | 36           | Canada (91.7)               | 41 (35–55)             | 1.1        | Metro (83.3)                   | Euro-American       |
| MClust-035    | 17           | Canada (88.2)               | 39 (32–58)             | 1.7†       | Metro (82.4)                   | East-Asian          |
| MClust-052    | 17           | Canada (94.1)               | 49 (46–53)             | 3.2        | Metro (82.4)                   | Euro-American       |
| MClust-134    | 13           | Canada (100.0)              | 59 (46–68)             | 3.3        | Rural (84.6)                   | Euro-American       |
| MClust-055    | 10           | Canada (100.0)              | 38 (31–43)             | 1.5        | Urban/Rural (70.0)             | Euro-American       |
| Foreign-born  |              |                             |                        |            |                                |                     |
| MClust-011    | 34           | Philippines (97.0)          | 41 (31–50)             | 2.1        | Metro (76.5)                   | Indo-Oceanic        |
| MClust-021    | 25           | Philippines (100.0)         | 50 (31–54)             | 0.8        | Metro (84.0)                   | Indo-Oceanic        |
| MClust-038    | 16           | China/Hong Kong (87.5)      | 76 (64–81)             | 1.3        | Metro (100.0)                  | East-Asian          |
| MClust-187    | 16           | China/Hong Kong (80.0)      | 66 (47–87)             | 0.6        | Metro (100.0)                  | East-Asian          |
| MClust-149    | 13           | India (84.6)                | 59 (34–79)             | 0.9        | Metro (61.5)                   | East-African Indian |
| MClust-046    | 12           | India (75.0)                | 71 (64–78)             | 2.0        | Metro (91.7)                   | East-African Indian |
| MClust-032    | 11           | Mixed‡                      | 54 (48–82)             | 1.2        | Metro (100.0)                  | East-Asian          |

*IQR—interquartile range.*

*\*Information for birthplace was unknown for 9 patients; percentage represents those with complete data.*

*†Not included in the ratio, 1 transgender/gender unknown individual.*

*‡Predominantly East Asian and South-East Asian countries*
